# Supplementary material for: A novel assembling complex of hydrobobic phthalocyanine-cyclodextrin: preparation, characterization, molecular modeling, and in vitro activity
Source: Royal Society of Chemistry journal article supplement (doi:10.1039/c4ra12654h), 2014-11-06
Supplement: c4ra12654h1.pdf [file c4ra12654h1.pdf]

## A novel assembling complex of hydrobobic phthalocyanine-cyclodextrin: Preparation, characterization, molecular modeling, and *in vitro* activity

Shan Lu, Yanjie Ma, Hongyun Xuan, Ao Wang, Bo Zhao, Xiaodong Li, Jiahong Zhou, Yun Lin, Lin Zhou\* and Shaohua Wei\*

Tetra-1, 2-diethylamino substituted zinc (II) phthalocyanine (ZnPc) was synthesized according our previous reports using classic DBU catalyst method. The synthesizing process was listed as followed.

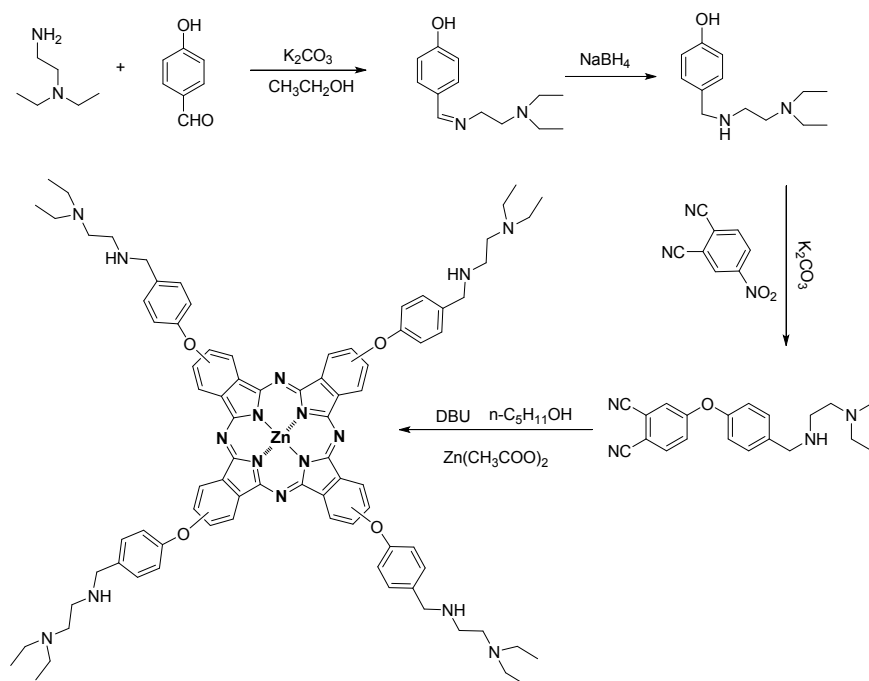

Fig. S1. Synthetic route to ZnPc.

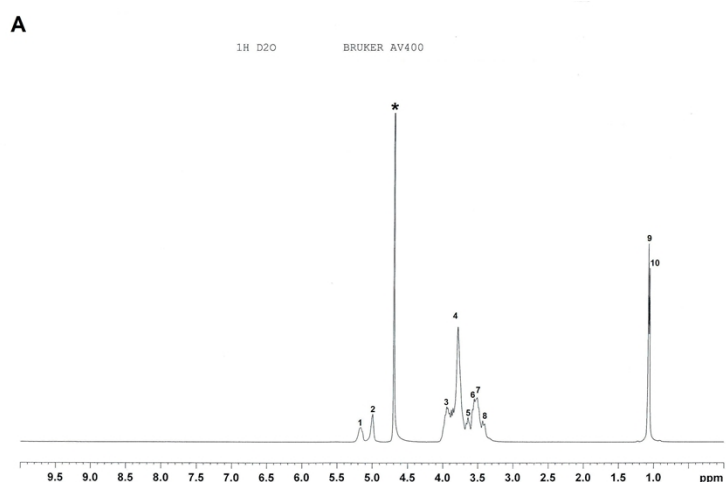

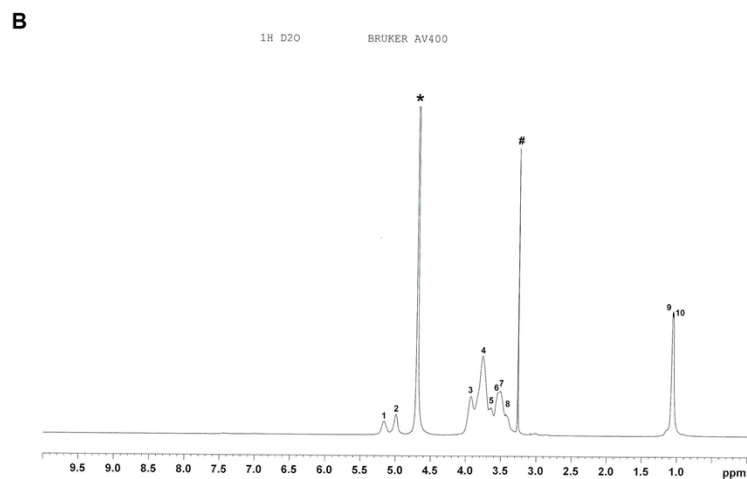

**Fig. S2.**  $^1\text{H}$  NMR spectra of HP- $\beta$ -CD in the absence (A) and presence (B) of ZnPc in  $\text{D}_2\text{O}$  at 25  $^\circ\text{C}$  (\* marked signal is the  $\text{D}_2\text{O}$  peak, # marked signal is the residual methanol peak).

**Table S1.** The main chemical shifts of the HP- $\beta$ -CD and (HP- $\beta$ -CD) $_4$ -ZnPc.

|      | $\delta(\text{ppm})$ |                              |
|------|----------------------|------------------------------|
|      | HP- $\beta$ -CD      | (HP- $\beta$ -CD) $_4$ -ZnPc |
| H-1  | 5.165                | 5.165                        |
| H-2  | 5.005                | 4.994                        |
| H-3  | 3.946                | 3.929                        |
| H-4  | 3.790                | 3.765                        |
| H-5  | 3.642                | 3.640                        |
| H-6  | 3.552                | 3.546                        |
| H-7  | 3.513                | 3.512                        |
| H-8  | 3.433                | 3.429                        |
| H-9  | 1.078                | 1.071                        |
| H-10 | 1.062                | 1.060                        |

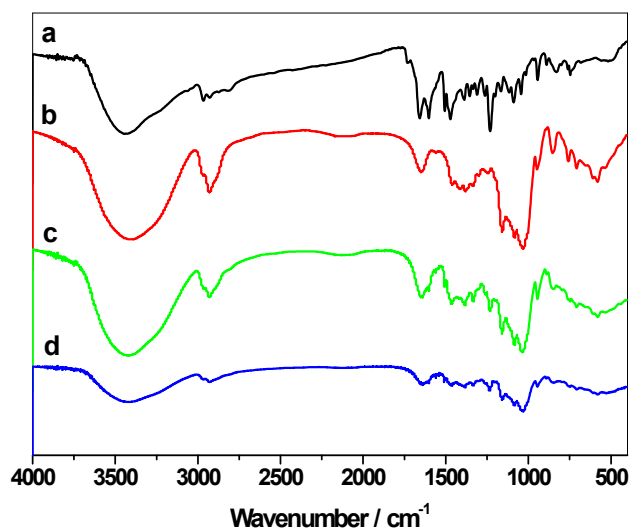

**Fig. S3.** FTIR spectra of ZnPc (a), HP-β-CD (b), physical mixture (c) and (HP-β-CD)<sub>4</sub>-ZnPc (d).

**Table S2.** The detail of Decomposition temperature, Rate of weight loss at decomposition temperature and Total rate of weight loss from 20 to 800 °C for ZnPc, HP-β-CD, physical mixture and (HP-β-CD)<sub>4</sub>-ZnPc.

|                              | Decomposition temperature | Rate of weight loss at decomposition temperature | Total rate of weight loss from 20 to 800 °C |
|------------------------------|---------------------------|--------------------------------------------------|---------------------------------------------|
| HP-β-CD                      | 324.9 °C                  | 11.3%                                            | 93.9%                                       |
| ZnPc                         | 306.8 °C                  | 2.2%                                             | 52.4%                                       |
| Physical mixture             | 331.9 °C                  | 11.7%                                            | 88.9%                                       |
| (HP-β-CD) <sub>4</sub> -ZnPc | 341.9 °C                  | 9.5%                                             | 77.2%                                       |

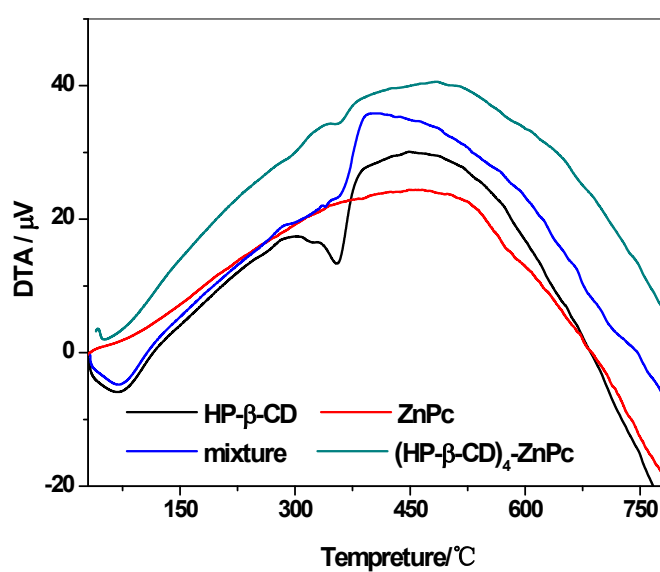

**Fig. S4.** DTA curves ZnPc, HP-β-CD, physical mixture and (HP-β-CD)<sub>4</sub>-ZnPc.

**Table S3.** The Endothermic peak of ZnPc, HP-β-CD, physical mixture and (HP-β-CD)<sub>4</sub>-ZnPc.

|                              | Endothermic peak 1 | Endothermic peak 2 |
|------------------------------|--------------------|--------------------|
| ZnPc                         | -----              | -----              |
| HP-β-CD                      | 70.0 °C            | 355.1 °C           |
| Physical mixture             | 71.3 °C            | 356.2 °C           |
| (HP-β-CD) <sub>4</sub> -ZnPc | 49.7 °C            | 359.2 °C           |

Table S4. The value of pK<sub>a</sub> and LogD for (HP-β-CD)<sub>4</sub>-ZnPc at 25 °C.

| Drugs                        | pK <sub>a</sub> | LogP   |
|------------------------------|-----------------|--------|
| (HP-β-CD) <sub>4</sub> -ZnPc | 7.72            | -0.033 |

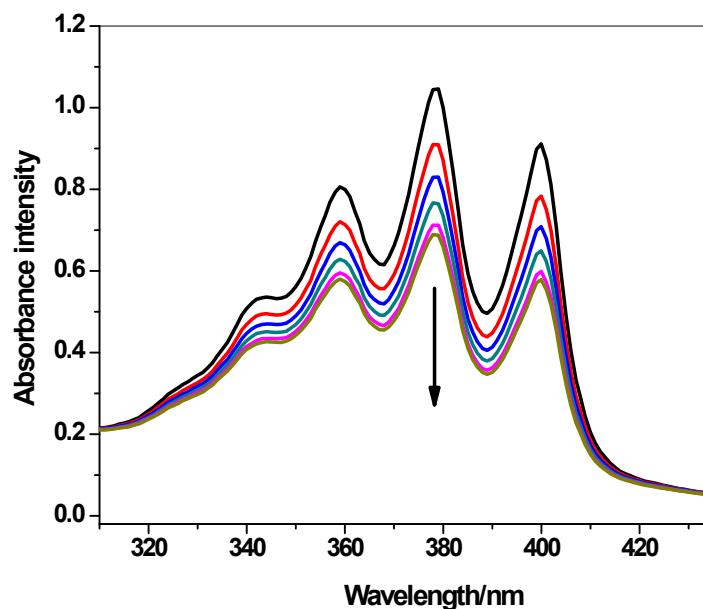**Fig. S5.** Absorption spectra of ADPA in ZnPc system were irradiated for 0, 30, 60, 90, 120 and 150 s by 665 nm LED ([ZnPc]= 6 μM, [ADPA]= 55 μM).

The following equations are tailored specifically to the system we are dealing with, in which ADPA and sensitizer are irradiated together in a solution. Hypothetically, the following processes may take place:

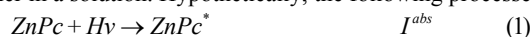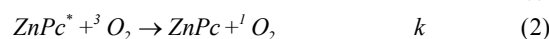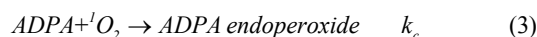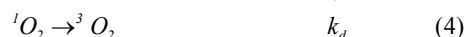

Here  $k$  is the rate constant for the quenching of excited HB by triplet oxygen to produce  ${}^1\text{O}_2$ ;  $k_c$  is the rate constant of chemical quenching of  ${}^1\text{O}_2$  in the presence of ADPA; however, the  ${}^1\text{O}_2$  molecule also decays to the ground state by energy transfer to the solvent or to other species in solution, with a rate constant  $k_d$ . A rough estimation of the rate constant for the chemical quenching of ADPA by  ${}^1\text{O}_2$  can be obtained using a simplification in which  $[{}^1\text{O}_2]$  is independent of [ADPA]. According to Eq. (3), the loss of ADPA in reaction with  ${}^1\text{O}_2$  is given by

$$-d[\text{ADPA}]/dt = k_c[\text{ADPA}][{}^1\text{O}_2] = k[\text{ADPA}]$$

Where

$$k = k_c [^1O_2] = \Phi ^1O_2 I^{abs} k_c / k_d$$

Thus, the decay of [ADPA] follows first order kinetics.

$$[ADPA]_t = [ADPA]_0 \exp(-kt)$$

$$\ln([ADPA]_t / [ADPA]_0) = -kt$$

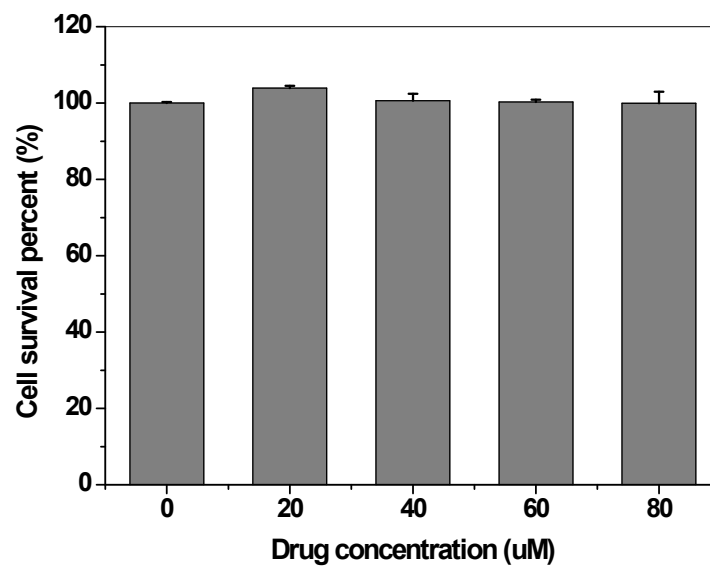

Fig. S6. The toxicity of HP- $\beta$ -CD with increased concentration on HeLa cells.

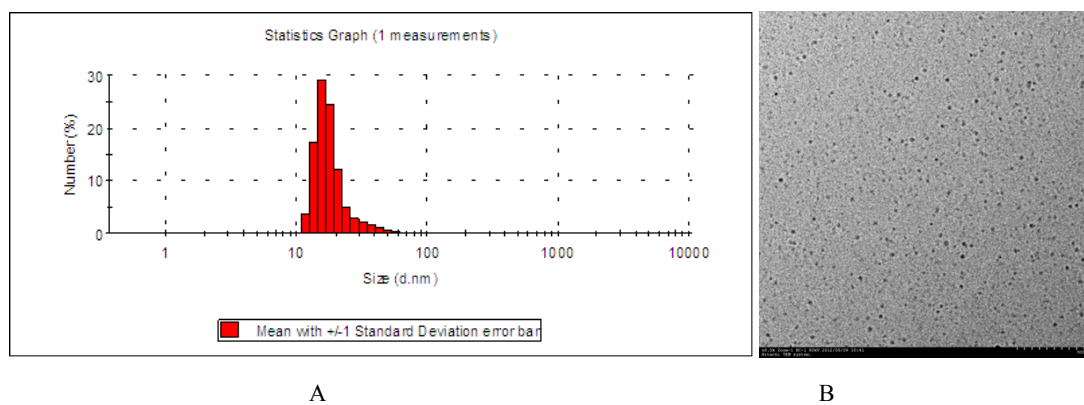

Fig. S7. (A) Size distribution of (HP- $\beta$ -CD)<sub>4</sub>-ZnPc in aqueous solution; (B) TEM image of (HP- $\beta$ -CD)<sub>4</sub>-ZnPc in aqueous solution.

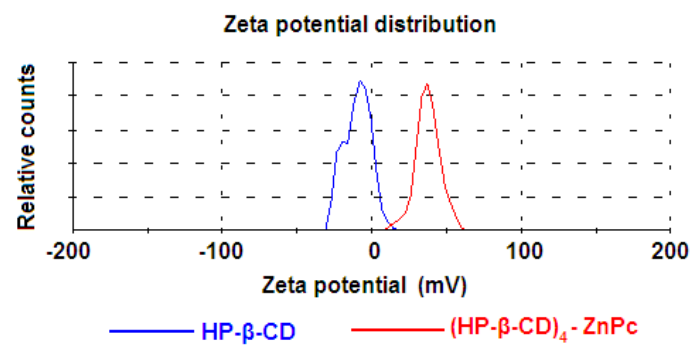

Fig. S8. Zeta potential of (HP-β-CD)<sub>4</sub>-ZnPc and HP-β-CD in aqueous solution.
